# Supplementary material for: Distinction between 2′- and 3′-Phosphate Isomers of a Fluorescent NADPH Analogue Led to Strong Inhibition of Cancer Cells Migration
Source: MDPI journal article supplement (doi:10.3390/antiox10050723), 2021-05-04

## Electronic Supplementary data

### Distinction between 2'- and 3' - phosphate isomers of a fluorescent NADPH analogue led to strong inhibition of cancer cells invasion.

Raoul Manuel<sup>a,†</sup>, Michelle de Souza Lima<sup>a,†</sup>, Sébastien Dilly<sup>a,†</sup>, Sylvain Daunay<sup>b</sup>, Patricia Abbe<sup>c</sup>, Elodie Pramila<sup>a</sup>, Stéphanie Solier<sup>d</sup>, Fabienne Guillaumond<sup>e</sup>, Sarah-Simha Tubiana<sup>e</sup>, Alexandre Escargueil<sup>a</sup>, João Antonio Pêgas Henriques<sup>f,g</sup>, Nathalie Ferrand<sup>a</sup>, Irène Erdelmeier<sup>b</sup>, Jean-Luc Boucher<sup>h</sup>, Gildas Bertho<sup>h</sup>, Israel Agranat<sup>i</sup>, Stéphane Rocchi<sup>c</sup>, Michèle Sabbah<sup>a</sup> and Anny Slama Schwok<sup>a,\*</sup>

#### Table of Contents

##### I-Chemistry

|                       |    |
|-----------------------|----|
| Separation of isomers | p2 |
|-----------------------|----|

##### II-Supplementary Figures

|                                                                                                                                                                                  |     |
|----------------------------------------------------------------------------------------------------------------------------------------------------------------------------------|-----|
| <b>Figure S1:</b> HPLC profiles of purified NS1-2 and NS1-3.                                                                                                                     | P4  |
| <b>Figure S2:</b> <sup>1</sup> H spectra of isolated NS1-2.                                                                                                                      | P5  |
| <b>Figure S3:</b> <sup>31</sup> P NMR spectra of isolated NS1-2.                                                                                                                 | P6  |
| <b>Figure S4:</b> <sup>1</sup> H NMR spectra of isolated NS1-3.                                                                                                                  | P7  |
| <b>Figure S5:</b> TOCSY NMR spectra of isolated NS1-3.                                                                                                                           | P8  |
| <b>Figure S6:</b> <sup>31</sup> P NMR spectra of isolated NS1-3.                                                                                                                 | P9  |
| <b>Figure S7:</b> NOX2 Western blot in different mice organs and amido black gel                                                                                                 | p10 |
| <b>Figure S8:</b> Cell viability of U266 (myeloma) and HTC116 (colon cancer) treated cells with NS1, NS1-2 or NS1-3; viability of breast cancer cells MDA-MB231 treated with NS1 | p10 |
| <b>Figure S9:</b> Abundance of NOS and NOX isoforms mRNAs in MDA231 cells.                                                                                                       | P11 |
| <b>Figure S10:</b> Difference in cell migration relative to control of treated cells with NS1-2 or NS1-3 and Raw cell migration data                                             | P11 |
| <b>Figure S11:</b> Ramachandran plots of the NOX2 model.                                                                                                                         | P12 |

## I-Chemistry

### *Separation of isomers*

The analytic separation of each isomer was performed on a HPLC system consisting of a Agilent pump connected to a Kromasil 5 $\mu$  C18 (250 x 46 mm) column and a Agilent detector set at  $\lambda = 445$  nm. Data acquisition and treatment were performed with Agilent software. The solvent was a mixture of A: water + 0.1% formic acid, and B: acetonitrile + 0.1% formic acid with the following gradient: 0 to 22 min, 90% A; 22 to 27 min, 20% A; 27 to 38 min, 90% A. Flow rate was 1 mL/min and injection volumes were 20  $\mu$ L.

The preparative separation of the isomeric mixture was performed on a preparative prepacked C18-grafted (50 $\mu$ m, 30g) column after preconditioning with a mixture of water/acetonitrile (95:5) containing 0,2% ammonium hydroxide solution (20%), followed by elution with a mixture of water/acetonitrile (85:15) containing 0,2% ammonium hydroxide solution (20%). Ten mL fractions were collected. Pure NS1-3 fractions were collected in fractions 11-15 and enriched NS1-2 isomer in fraction 21-23. The compounds were isolated after partial evaporation followed by lyophilization.

NS1-2'-Phosphate isomer (NS1-2) and NS1-3'phosphate isomer (NS1-3) were recovered ~85% and > 95% pure according to analytical HPLC,  $^1\text{H}$  and  $^{31}\text{P}$  NMR spectroscopy (Supplementary figures 1-6). Due to the higher purity of NS1-3, full identification of H-atoms of its ribose moiety is shown on Figures S4 and S5.

### *NMR spectra of NS1-2*

$^1\text{H}$  NMR (DMSO- $d_6$ )  $\delta$  9.19 (t, 1H, NH,  $J = 5.5$ ), 8.40 (s, H<sub>21</sub>), 8.17 (d, 2H<sub>16</sub>,  $J^{\text{H15-H16}} = 9.0$ ), 8.00 (s, H<sub>18</sub>), 7.77 (d, 2H<sub>15</sub>,  $J^{\text{H15-H16}} = 9.0$ ), 7.48 (d, 2H<sub>10</sub>,  $J^{\text{H9-H10}} = 8.5$ ), 7.40 (m, H<sub>12</sub> + NH<sub>2</sub>,  $J^{\text{H12-H13}} = 15.0$ ), 7.10 (d, H<sub>13</sub>,  $J^{\text{H12-H13}} = 15.0$ ), 6.77 (d, 2H<sub>9</sub>,  $J^{\text{H9-H10}} = 8.5$ ), 6.06 (d, H<sub>1</sub>,  $J^{\text{H1-H2}} = 7.6$ ), 4.82 (m, H<sub>2</sub>,  $J^{\text{H2-H3}} = 4.5$ ,  $J^{\text{H2-P}} = 3.0$ ), 4.46 (dd, H<sub>3</sub>,  $J^{\text{H2-H3}} = 4.5$ ,  $J^{\text{H3-H4}} = 1.7$ ), 4.34 (d, H<sub>4</sub>,  $J^{\text{H3-H4}} = 1.7$ ), 3.44-3.39 (m, 2H<sub>6</sub> + 2H<sub>7</sub> + 2H<sub>23</sub>), 1.07 (t, 3H<sub>24</sub>,  $J^{\text{H23-H24}} = 7.0$ ).

$^{13}\text{C}$  NMR (125 MHz, DMSO- $d_6$ )  $\delta$  170.1 (C=O), 156.2 (C), 152.4 (CH), 148.9 (C), 148.0 (C), 145.3 (C), 145.0 (C), 140.5 (CH), 134.0 (CH), 128.8 (CH), 126.2 (CH), 124.0 (CH), 123.4 (C), 120.8 (CH), 111.4 (CH), 87.5 (C<sub>1</sub>H), 84.1 (C<sub>4</sub>H), 75.1 (C<sub>2</sub>H), 72.8 (C<sub>3</sub>H), 48.5 (CH<sub>2</sub>), 44.8 (CH<sub>2</sub>), 36.4 (CH<sub>2</sub>), 12.0 (CH<sub>3</sub>).

$^{31}\text{P}$  NMR (DMSO- $d_6$ )  $\delta$  - 0.74.

### *NMR spectra of NS1-3*

$^1\text{H}$  NMR (DMSO- $d_6$ )  $\delta$  9.27 (t, 1H, NH,  $J = 5.5$ ), 8.40 (s, H<sub>21</sub>), 8.16 (d, 2H<sub>16</sub>,  $J^{\text{H15-H16}} = 9.0$ ), 8.07 (s, H<sub>18</sub>), 7.76 (d, 2H<sub>15</sub>,  $J^{\text{H15-H16}} = 9.0$ ), 7.48 (d, 2H<sub>10</sub>,  $J^{\text{H9-H10}} = 8.5$ ), 7.40 (m, H<sub>12</sub> + NH<sub>2</sub>,  $J^{\text{H12-H13}} = 15.0$ ), 7.10 (d, H<sub>13</sub>,  $J^{\text{H12-H13}} = 15.0$ ), 6.78 (d, 2H<sub>9</sub>,  $J^{\text{H9-H10}} = 8.5$ ), 5.98 (d, H<sub>1</sub>,  $J^{\text{H1-H2}} = 7.8$ ), 4.69 (m, H<sub>3</sub>,  $J^{\text{H2-H3}} = 4.1$ ,  $J^{\text{H3-P}} = 7.4$ ), 4.60 (dd, H<sub>2</sub>,  $J^{\text{H2-H3}} = 4.1$ ), 4.43 (d, H<sub>4</sub>,  $J^{\text{H3-H4}} = 0.8$ ), 3.41-3.35 (m, 2H<sub>6</sub> + 2H<sub>7</sub> + 2H<sub>23</sub>), 1.09 (t, 3H<sub>24</sub>,  $J^{\text{H23-H24}} = 7.0$ ).

$^{13}\text{C}$  NMR (125 MHz, DMSO- $d_6$ )  $\delta$  169.5 (C=O), 156.2 (C), 152.4 (CH), 148.9 (C), 148.0 (C), 145.3 (C), 145.0 (C), 140.5 (CH), 134.0 (CH), 128.8 (CH), 126.2 (CH), 124.0 (CH), 123.4 (C), 120.8 (CH), 111.4 (CH), 88.1 (C<sub>1</sub>H), 83.3 (C<sub>4</sub>H), 75.9 (C<sub>3</sub>H), 72.1 (C<sub>2</sub>H), 48.5 (CH<sub>2</sub>), 44.8 (CH<sub>2</sub>), 36.4 (CH<sub>2</sub>), 12.0 (CH<sub>3</sub>).

$^{31}\text{P}$  NMR (DMSO- $d_6$ )  $\delta$  0.94.

**Figure S1:** HPLC profiles of purified NS1-2 (top) and NS1-3 (bottom).

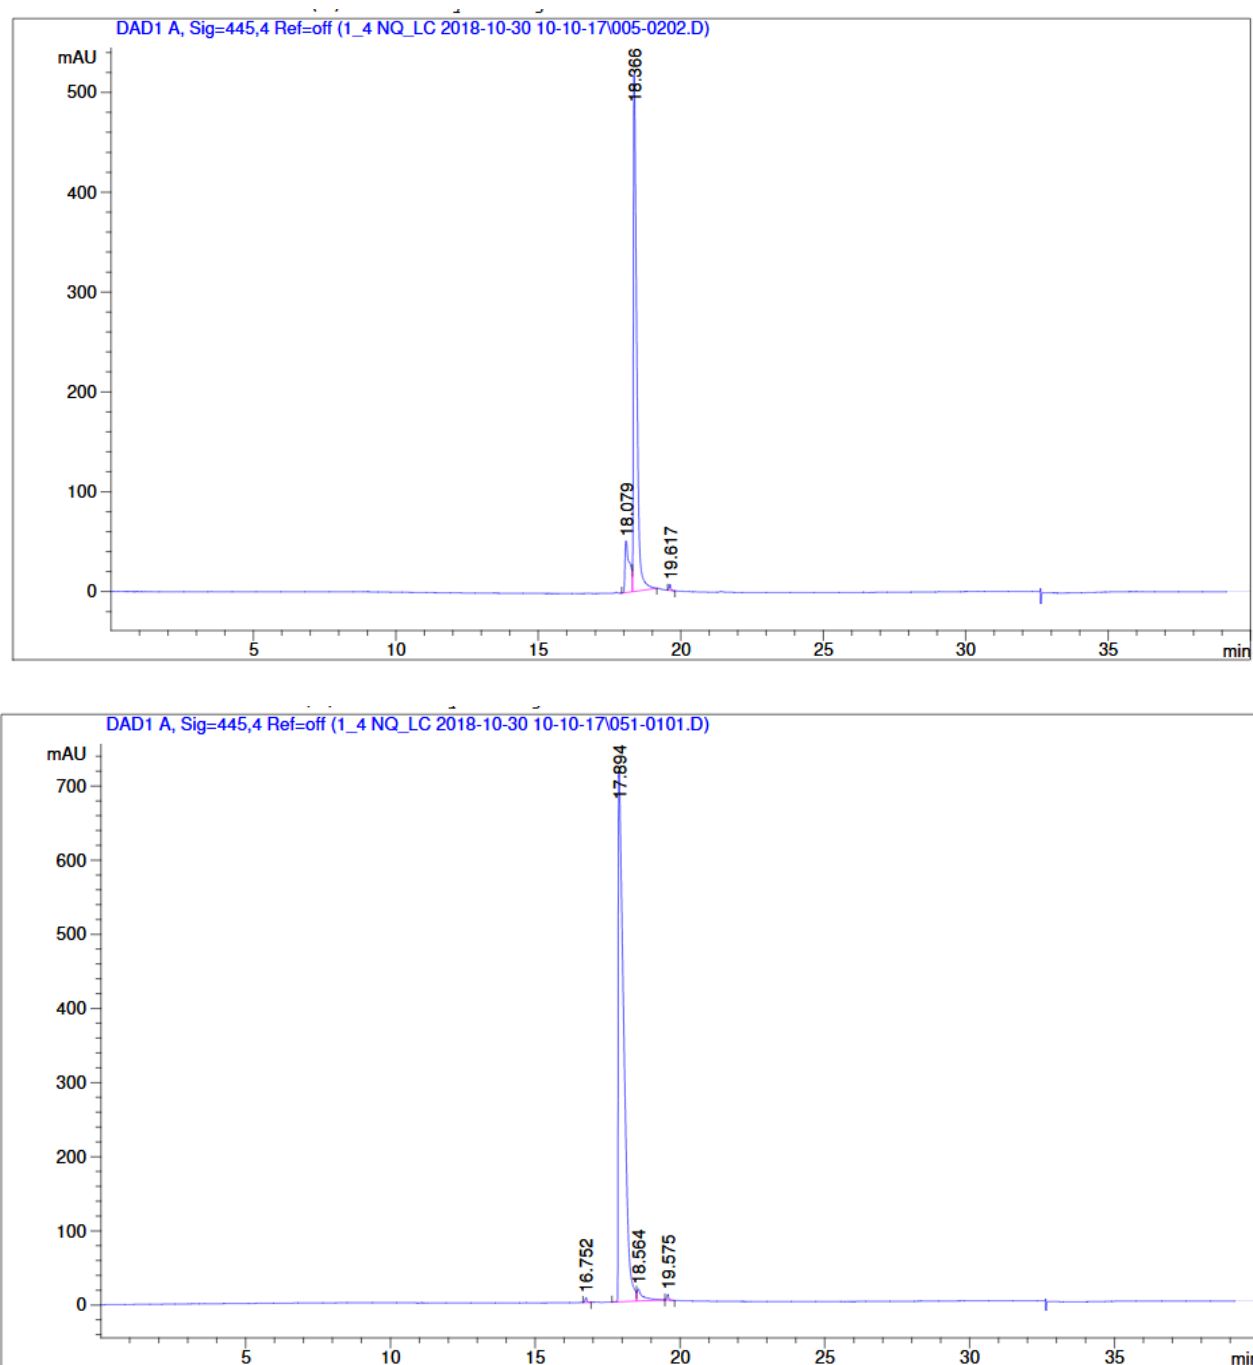

X-axis : Retention time (min). Y-axis: Absorbance at 450 nm.

**Figure S2:**  $^1\text{H}$  spectra of isolated NS1-2. Top: 4.0-9.5 ppm region. Bottom: 6.5-4.0 ppm region.

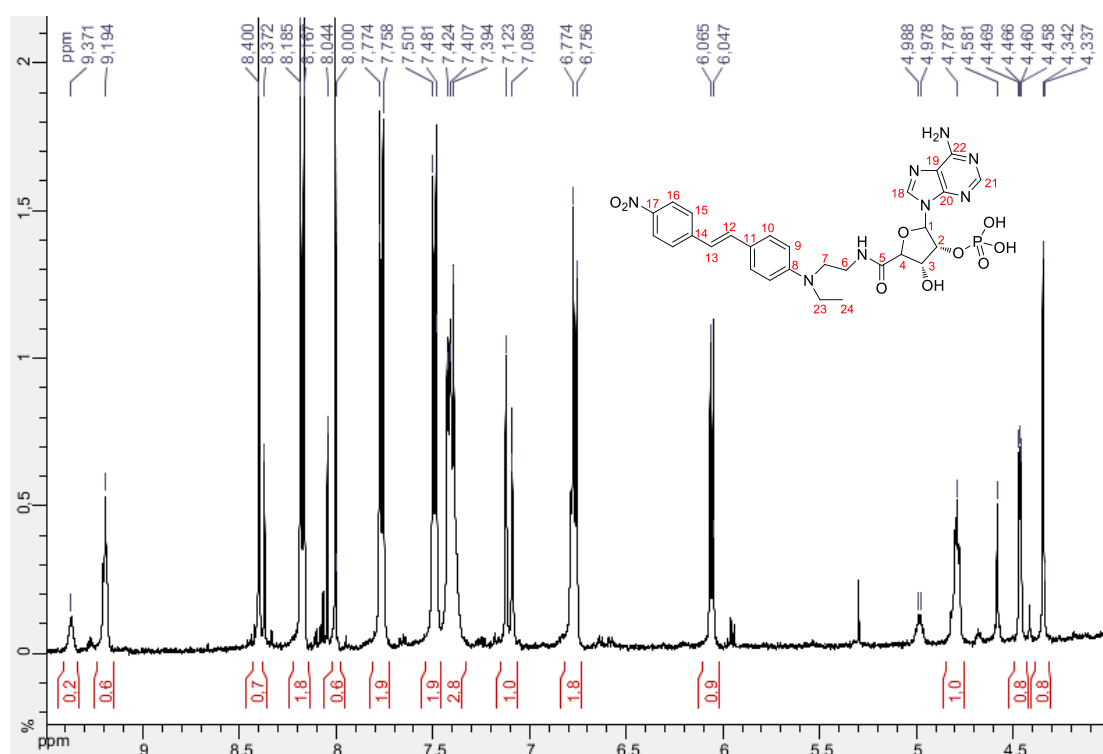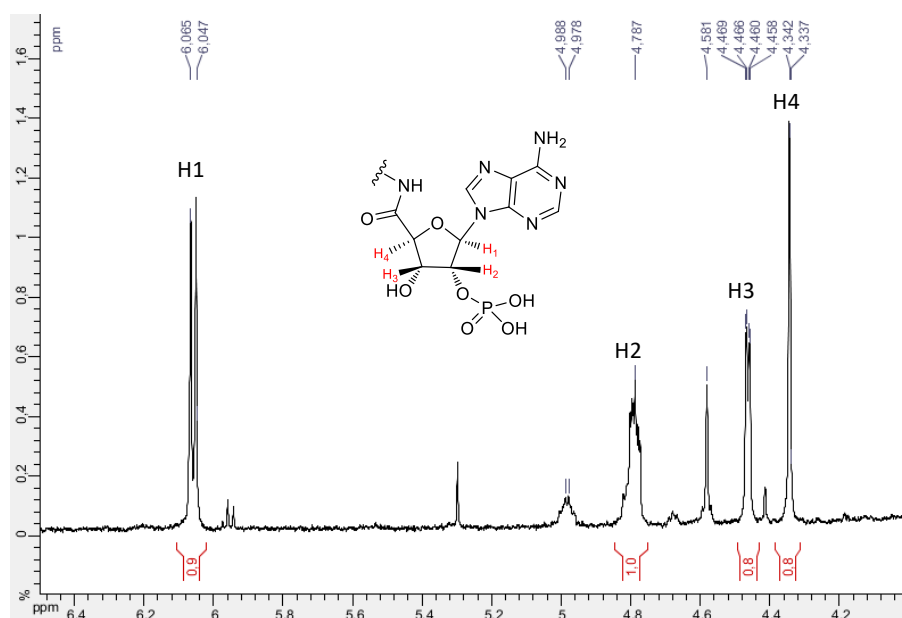

**Figure S3:**  $^{31}\text{P}$  NMR spectra of isolated NS1-2.

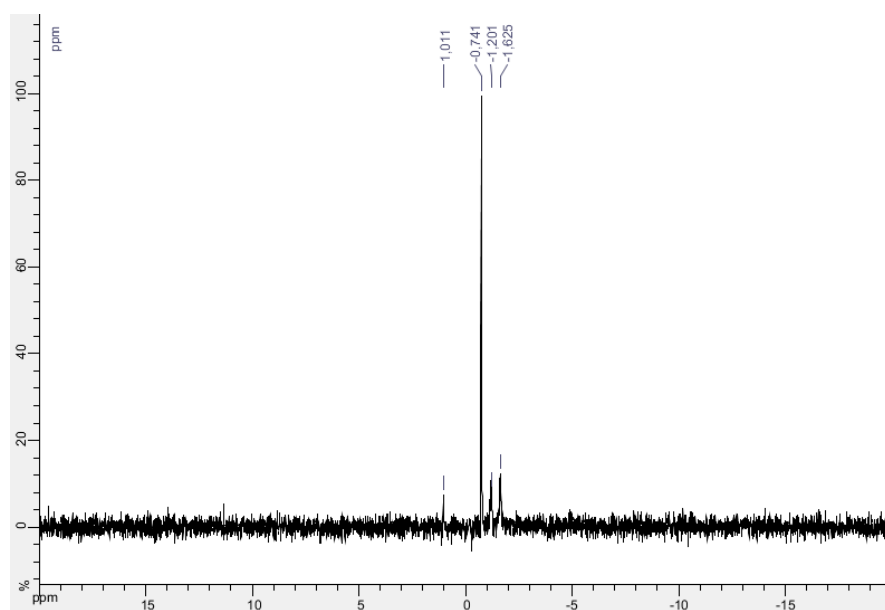

**Figure S4:**  $^1\text{H}$  NMR spectra of isolated NS1-3. Top: 4.0-9.5 ppm region. Bottom: 6.5-4.0 ppm region.

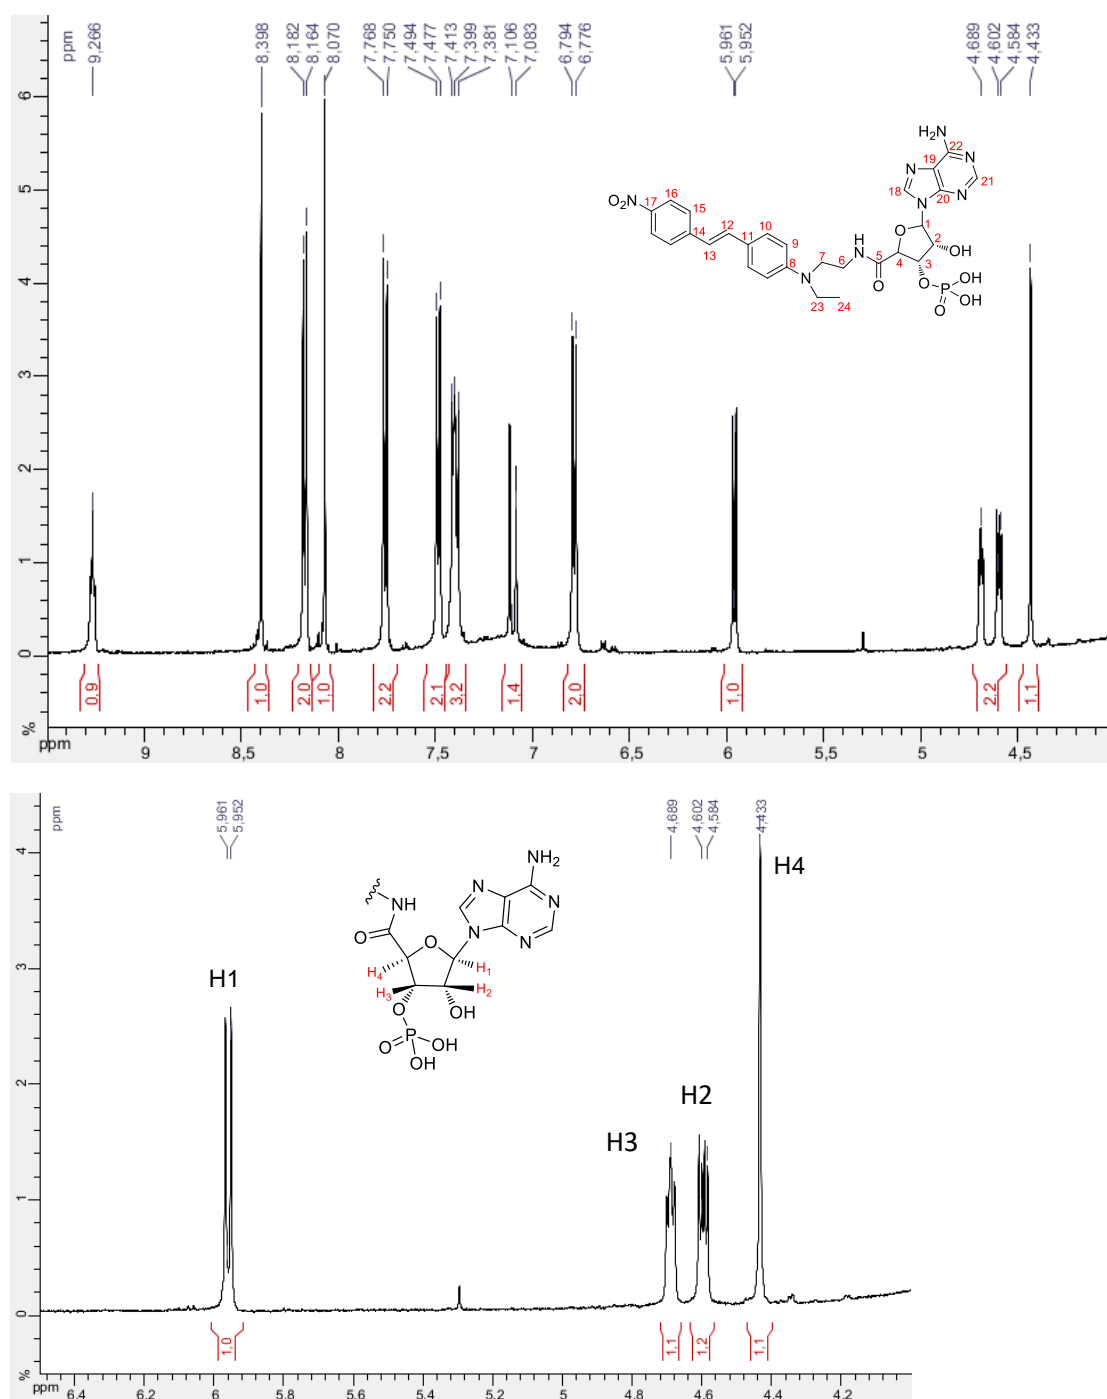

**Figure S5:** TOCSY NMR spectra of isolated NS1-3 (4.5-6.2 ppm region). Short and long mixing times allow clear identification of coupling constants.

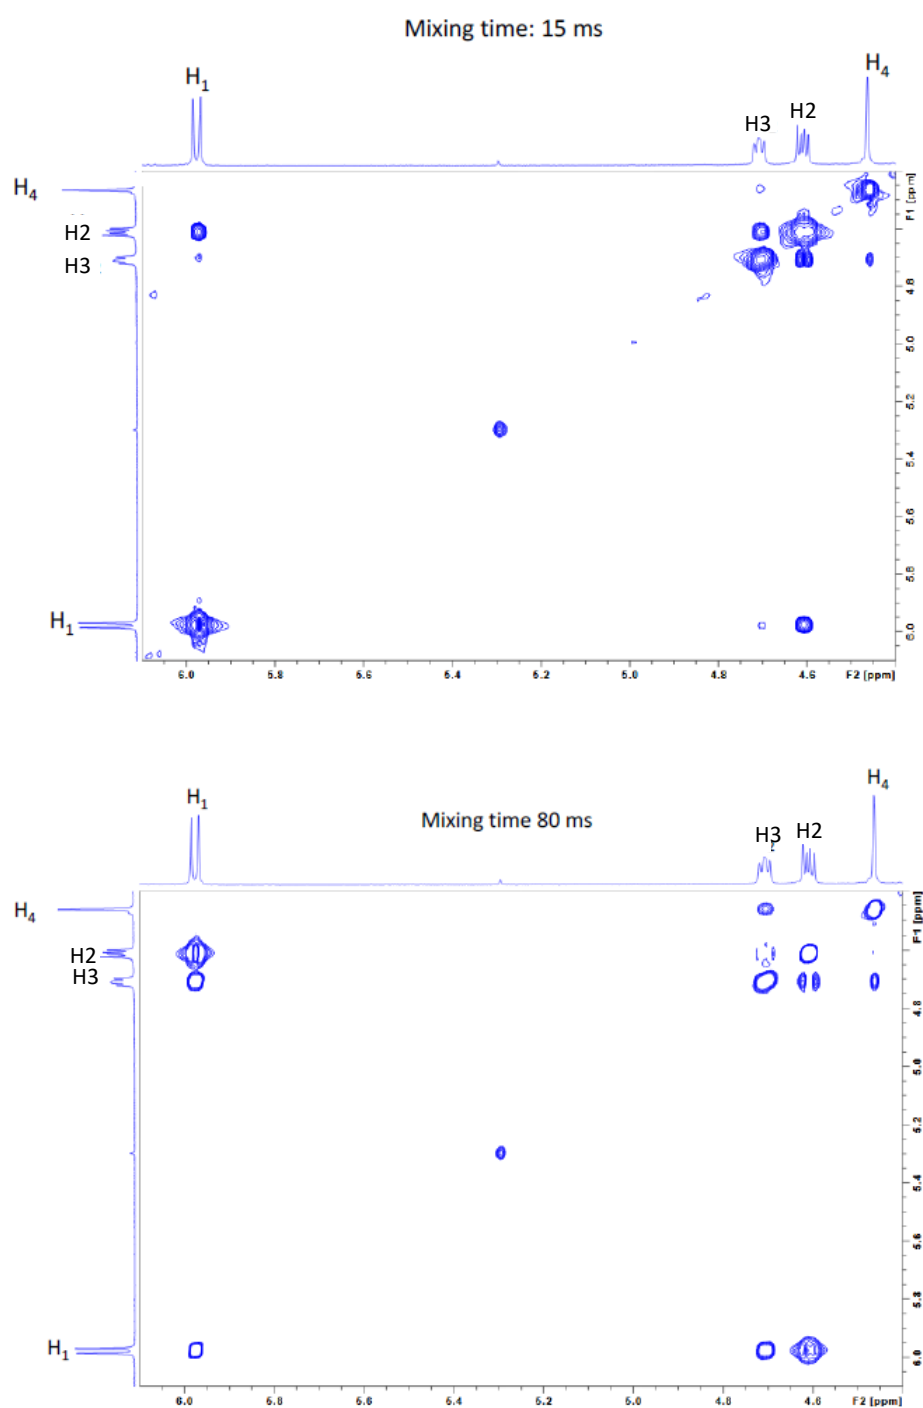



**Figure S7: NOX2 Western blot in different mice organs and amido black gel**

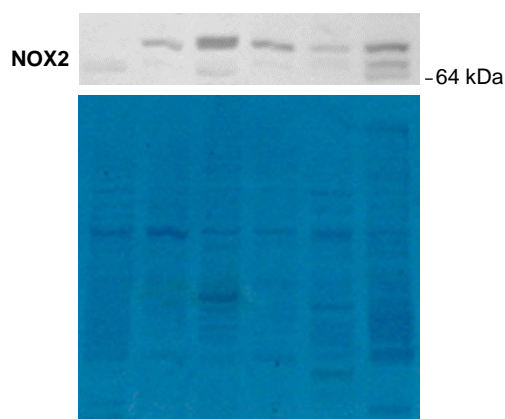

**Figure S8: Cell viability assays (by trypan blue or crystal violet cell counting)**

A: Viability at 24h and 48 h of U266 myeloma cells and HTC116 colon cancer cells treated for 24 or 48h with 50  $\mu$ M NS1, NS1-2 or NS1-3 as compared to DMSO. No change of viability of treated breast cancer cells has been observed using B: MDA-MB-231 cancer cells; the cells were treated during 2h with NS1 at different doses, washed and further cultured in fresh medium for 72h, their viability was tested at 72h.

**A**

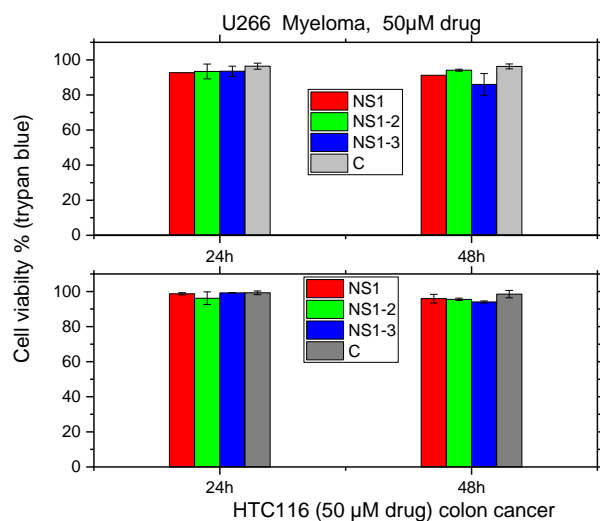

**B**

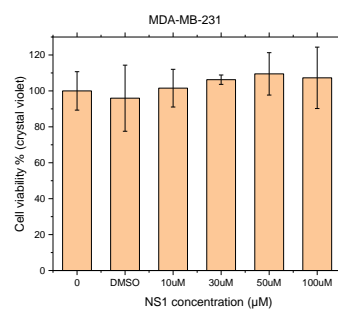

**Figure S9: Q-PCR of NOX isoforms in MDA-MB-231 cell line**

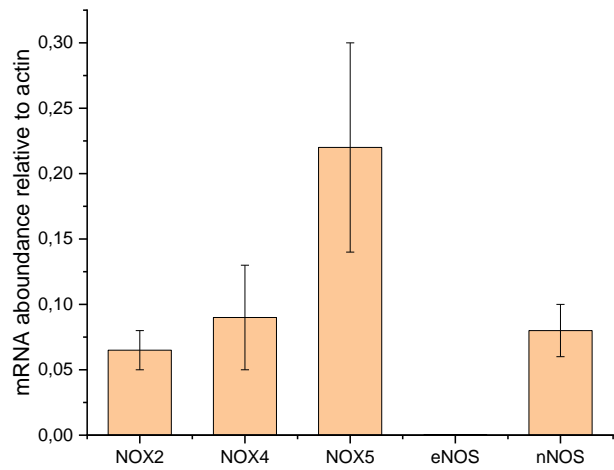

**Figure S10: A-Quantification of the cell migration difference of treated cells with NS1-2 or NS1-3 relative to control; B- Raw cell migration data**

**A**

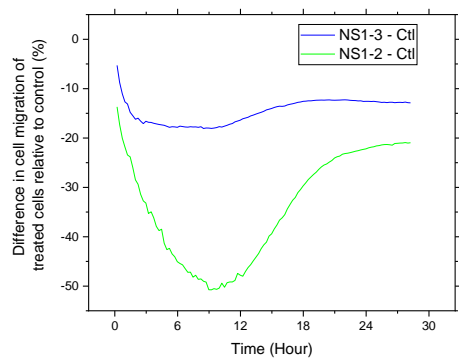

**B**

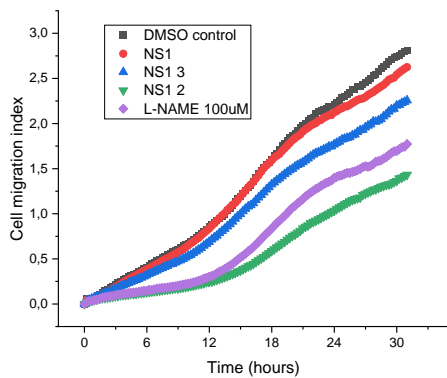

**Figure S11:** Ramachandran plots showing the quality of the NOX2 model obtained by homology modelling.

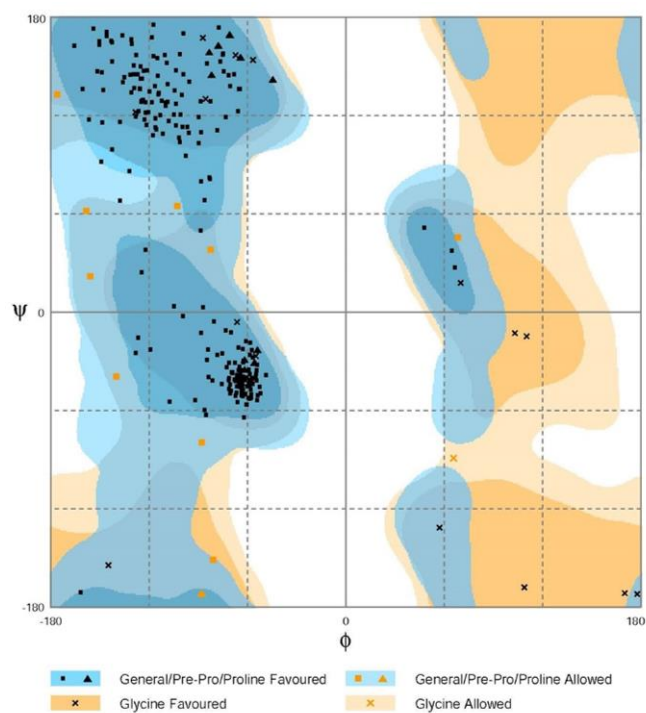

Supplement: s1 [file s1]
